# Supplementary material for: Molecular Characterization and Functional Analysis of Annulate Lamellae Pore Complexes in Nuclear Transport in Mammalian Cells
Source: PubMed Central journal article supplement (PMC4671610; doi:10.1371/journal.pone.0144508), 2015-12-07

S3 Fig.

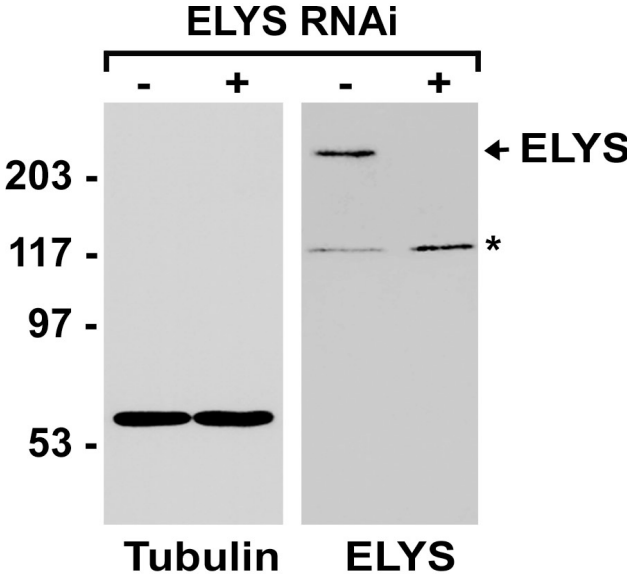

Supplement: pone.0144508.s003.pdf [file pone.0144508.s003.pdf]
